# Supplementary material for: Memory IgM protects endogenous insulin from autoimmune destruction
Source: PubMed Central journal article supplement — EMBO J. 2021 Aug 9;40(17):e107621. doi: 10.15252/embj.2020107621 (PMC8408592; doi:10.15252/embj.2020107621), 2021-08-09
Supplement: EMBJ-40-e107621-s001.pdf [file EMBJ-40-e107621-s001.pdf]

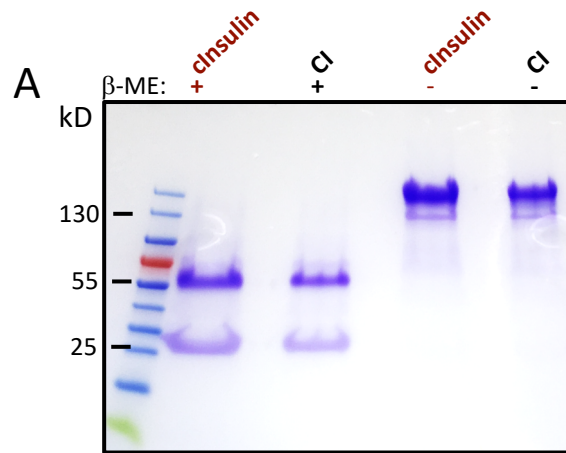

**Source data#1 (Figure 2h)**

**A:** Coomassie stained SDS-page showing purified serum IgG of cInsulin immunized (red, n=3) and CI mice (grey, n=3) under reducing (+  $\beta$ -ME), and non-reducing conditions. HC: heavy chain, LC: light chain. Representative of two independent experiments.
