# Supplementary material for: Memory IgM protects endogenous insulin from autoimmune destruction
Source: PubMed Central journal article supplement — EMBO J. 2021 Aug 9;40(17):e107621. doi: 10.15252/embj.2020107621 (PMC8408592; doi:10.15252/embj.2020107621), 2021-08-09
Supplement: EMBJ-40-e107621-s002.pdf [file EMBJ-40-e107621-s002.pdf]

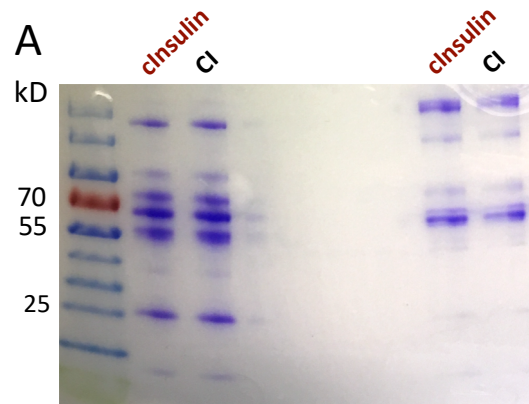

**Source data#3 (Figure 6e)**

**A:** Coomassie stained SDS-page showing purified serum IgM of complex InsA peptide (cInsA) immunized (n=3) and CI mice (n=3) under reducing (+ b-ME), and non-reducing conditions. HC: IgM heavy chain (69 kD), LC: light chain (25 kD). Representative of two independent experiments.
