# Supplementary material for: Memory IgM protects endogenous insulin from autoimmune destruction
Source: PubMed Central journal article supplement — EMBO J. 2021 Aug 9;40(17):e107621. doi: 10.15252/embj.2020107621 (PMC8408592; doi:10.15252/embj.2020107621), 2021-08-09
Supplement: EMBJ-40-e107621-s003.pdf [file EMBJ-40-e107621-s003.pdf]

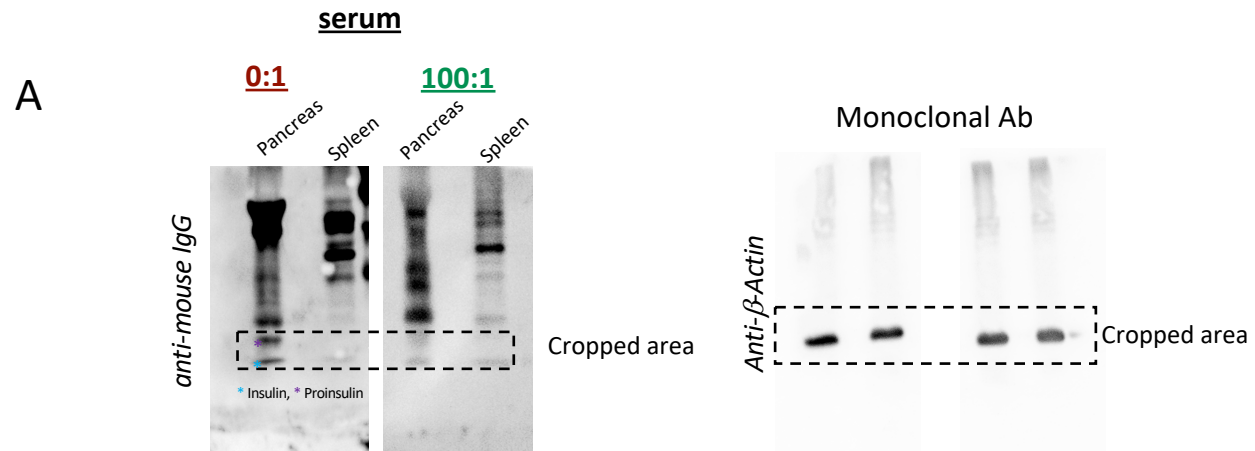

**Source data#2 (Figure 4c)**

**A:** Left, total lysates of pancreas and spleen of wild type mice were incubated with total serum (pooled) from mice immunized with InsA peptide at either 0:1 or 100:1 ratio of soluble to complex InsA. HRP-coupled anti-mouse IgG was used as secondary antibody for detection. Right panel, after development with serum the membranes were stripped multiple times and anti-β actin monoclonal antibody was then applied for loading control.
